# Supplementary material for: Human milk oligosaccharides protect against the development of autoimmune diabetes in NOD-mice
Source: PubMed Central journal article supplement (PMC5832804; doi:10.1038/s41598-018-22052-y), 2018-03-01

**Human milk oligosaccharides protect against the development of autoimmune diabetes  
in NOD-mice**

**Ling Xiao<sup>1</sup>, Belinda van't Land<sup>2,3\*</sup>, Phillip A. Engen<sup>4</sup>, Ankur Naqib<sup>5</sup>, Stefan J. Green<sup>5</sup>,  
Angie Nato<sup>1</sup>, Thea Leusink-Muis<sup>1</sup>, Johan Garssen<sup>1,2</sup>, Ali Keshavarzian<sup>1,4,6</sup>, Bernd Stahl<sup>2</sup>,  
Gert Folkerts<sup>1</sup>**

<sup>1</sup> Utrecht University, Faculty of Science, Department of Pharmaceutical Sciences, Division of Pharmacology, Utrecht, The Netherlands

<sup>2</sup> Nutricia Research, Department of Immunology / Human milk research platform, Utrecht, The Netherlands

<sup>3</sup> University Medical Center Utrecht, The Wilhelmina Children's Hospital, Laboratory of Translational Immunology, Utrecht, The Netherlands.

<sup>4</sup> Department of Internal Medicine, Division of Digestive Diseases and Nutrition, Rush University Medical Center, Chicago, IL USA

<sup>5</sup> DNA Services Facility, Research Resources Center, Department of Biological Sciences, University of Illinois at Chicago, Chicago, IL USA

<sup>6</sup> Department of Pharmacology, Department of Physiology, Rush University Medical Center, Chicago, IL USA

**Figure S1.** (A) Average body weight of NOD mice fed with HMOS or control diet overtime. Dietary intervention with HMOS does not change the body weight compared with non-treatment. (B) Occurrence of diabetes. Upper table shows the mice from control group and lower table shows the mice from HMOS group. Red highlights represent mice diagnosed as diabetic at specific week, mice were sacrificed once diagnosed as diabetic.

**Figure S2.** The spectrum of HMOS

**Figure S3.** Ratio of Firmicutes/Bacteroidetes in diabetic and non-diabetic mice

**Figure S4.** The Bray Curtis dissimilarity index. Samples from NOD-mice were divided into diabetic and non-diabetic subgroups. There is greater dissimilarity and variability in the microbial community in Week 30 HMOS Non-Diabetic mice. Broad microbial variability at Week 30 HMOS Non-Diabetic mice could indicate that HMOS is not specific to just one taxa, but HMOS could be altering a greater number of taxa in the overall microbial community.

**Figure S5.** PICRUSt-predicted metagenomes between the ratio of HMOS non-diabetic to Control non-diabetic mice fecal samples. Feces represent different log<sub>10</sub> value fold change functional pathways identified by PICRUSt software ( $P < 0.05$ ); 3 pathways were higher abundant in HMOS non-diabetic relative to control non-diabetic NOD-mice.

**Figure S6.** SCFAs production in cecum content.

**Figure S7.** The gating strategy used to identify expression of surface markers on DCs.

**Figure S8.** Effect of polymyxin B on HMOS induced surface markers expression (A) and IL-10 secretion (B). HMOS containing medium was pre-incubated with 10ug/ml polymyxin B for 2h before adding to iDCs for 24h. The expression of CD86, MHC-II, PD-L1 on DCs and IL-10 secretion on the DCs supernatant were analyzed. No significant difference was observed between HMOS and pre-treated HMOS. The histograms shown were from one representative experiment and cytokines results were from two independent experiments.

**Figure S9.** The gating strategy used to identify the different CD4<sup>+</sup> T-cell subpopulations.

**Figure S10.** The gating strategy used to determine CD4 T cells proliferation



**Figure S2**

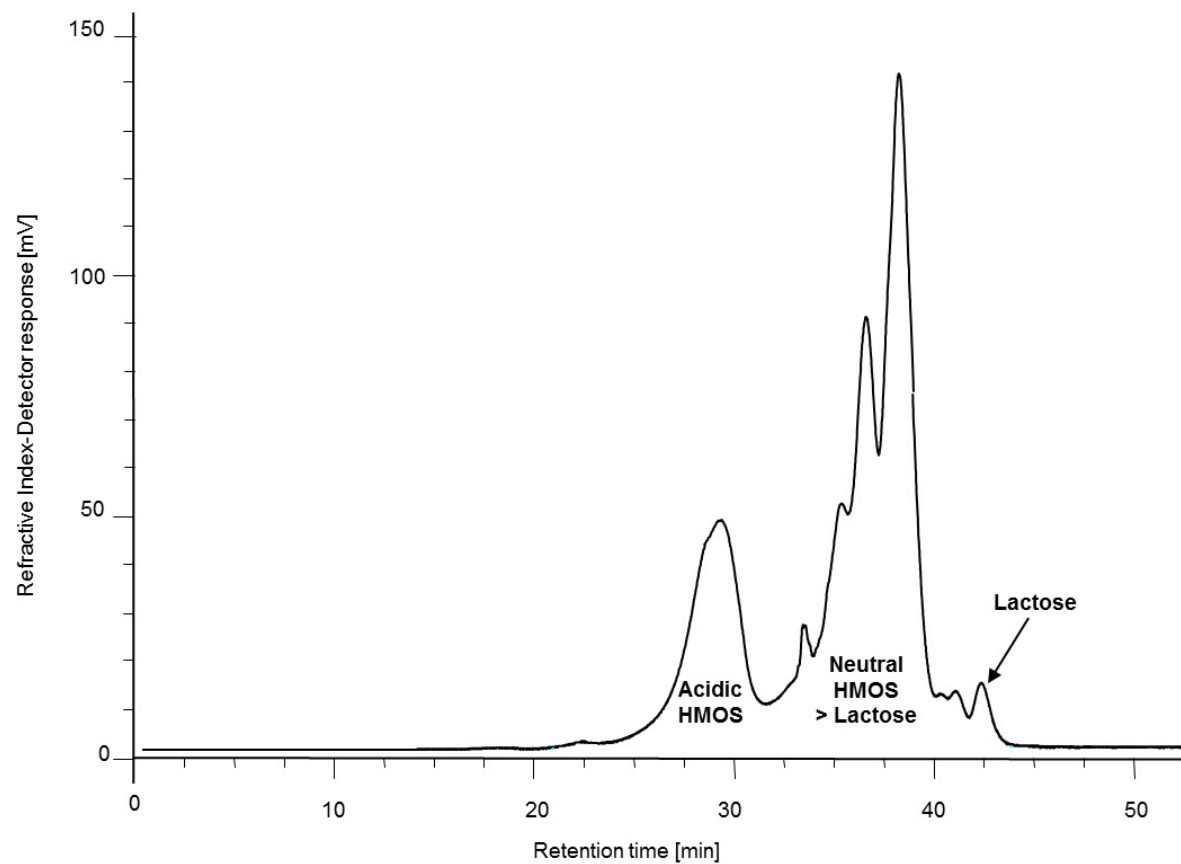

**Figure S3**

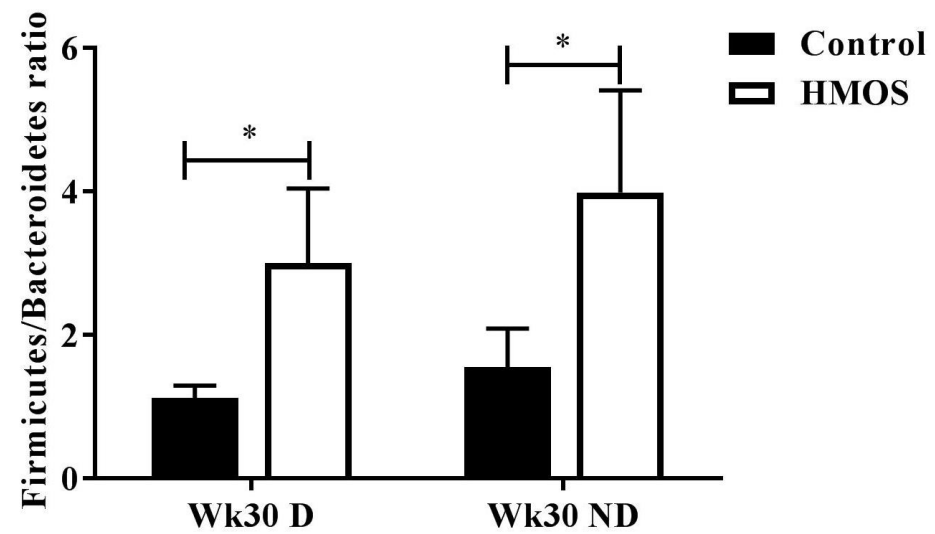

Figure S4

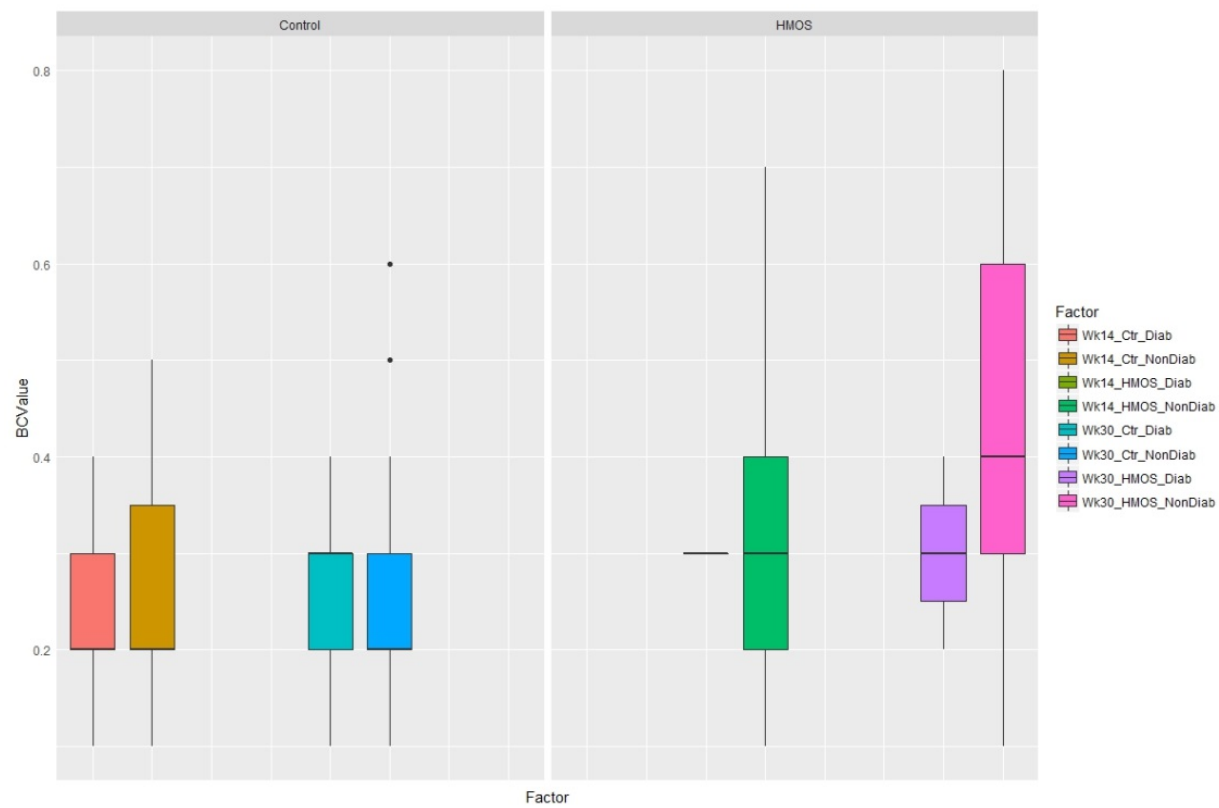

Figure S5

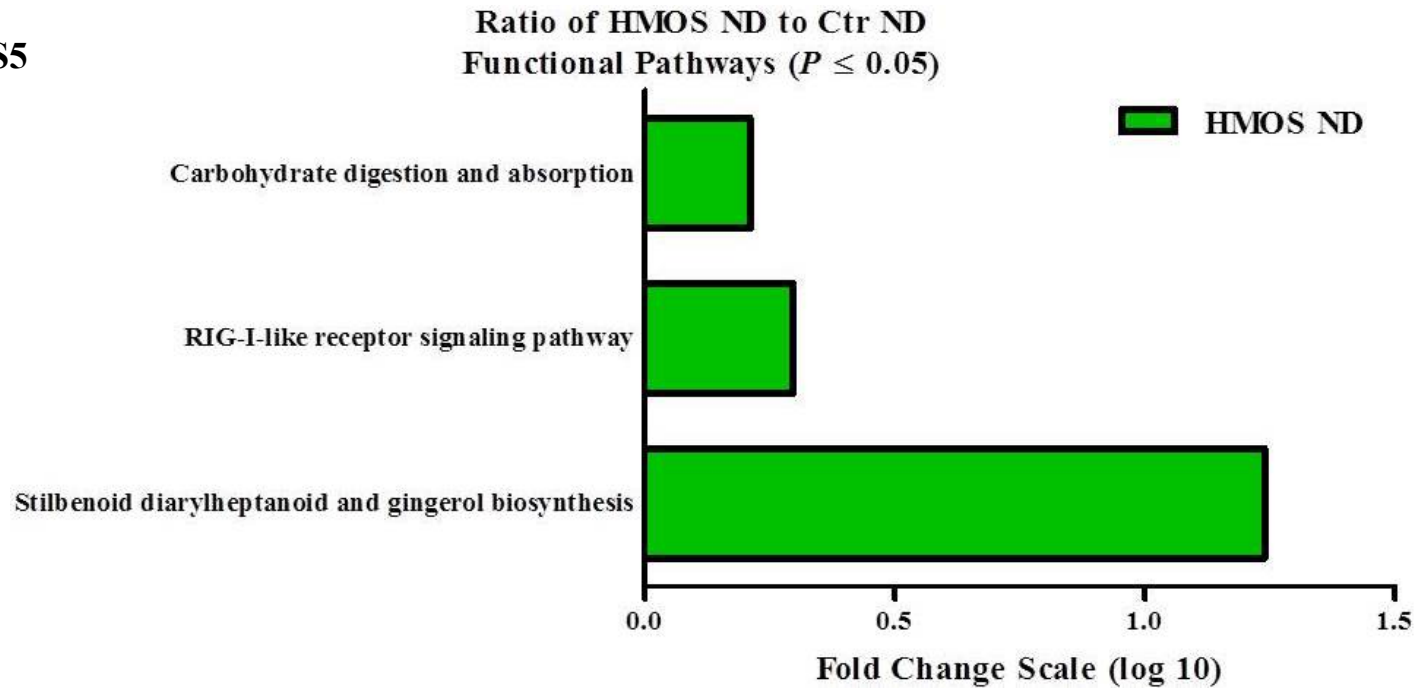

**Figure S6**

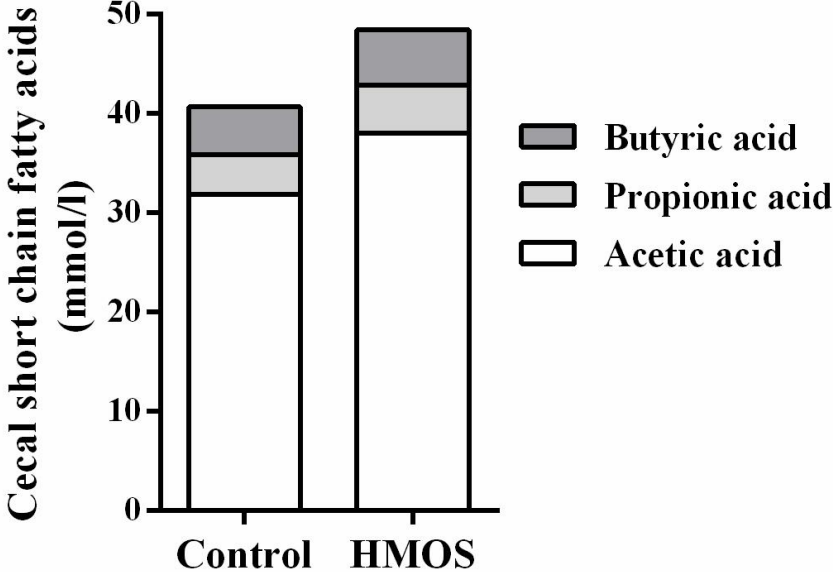

**Figure S7**

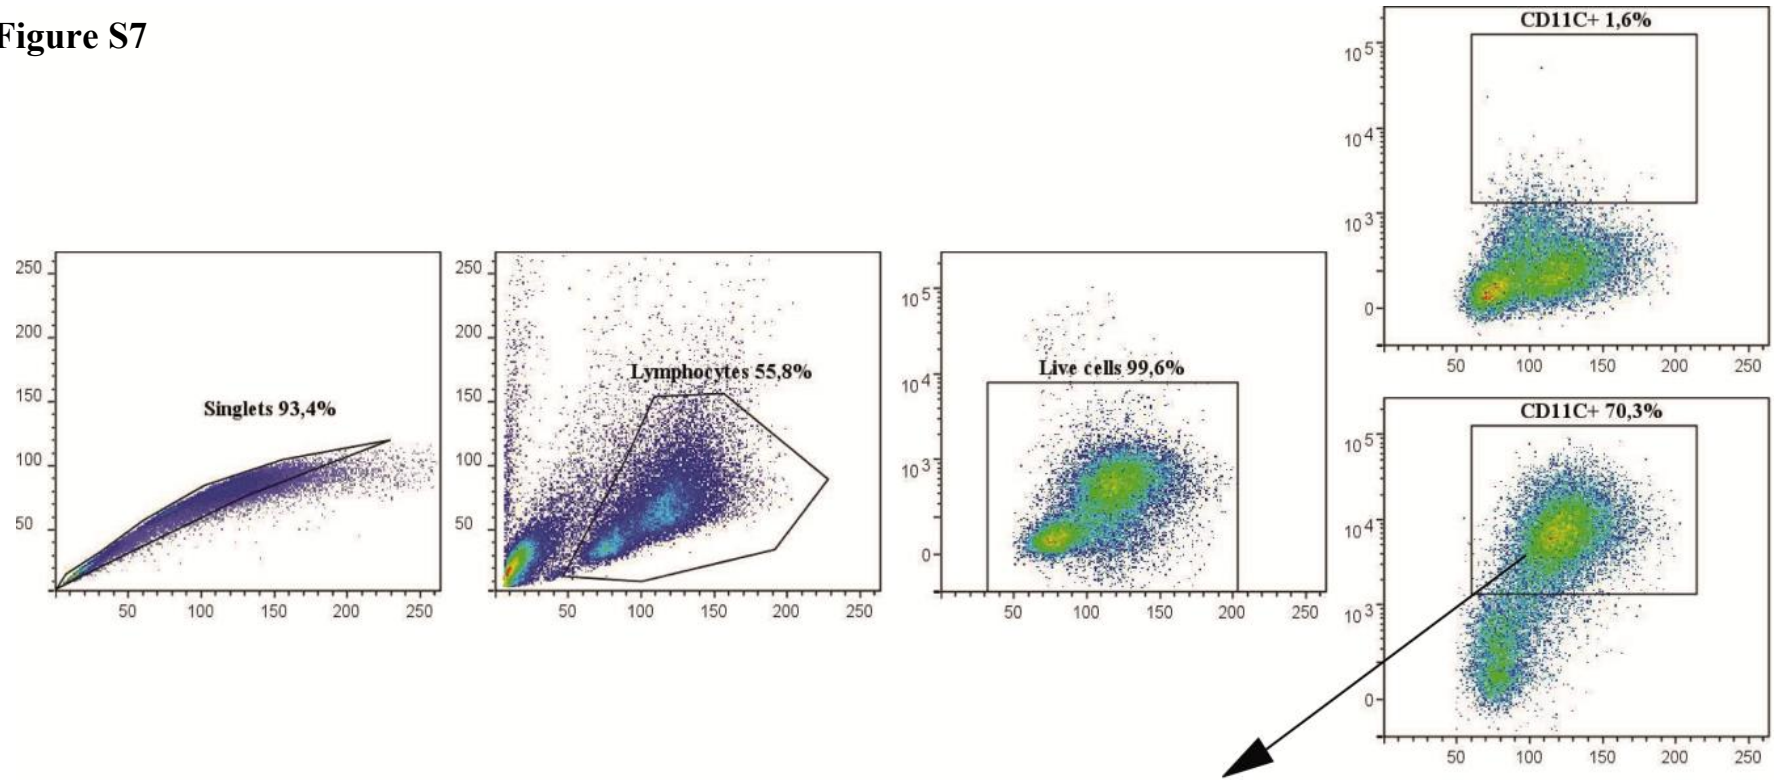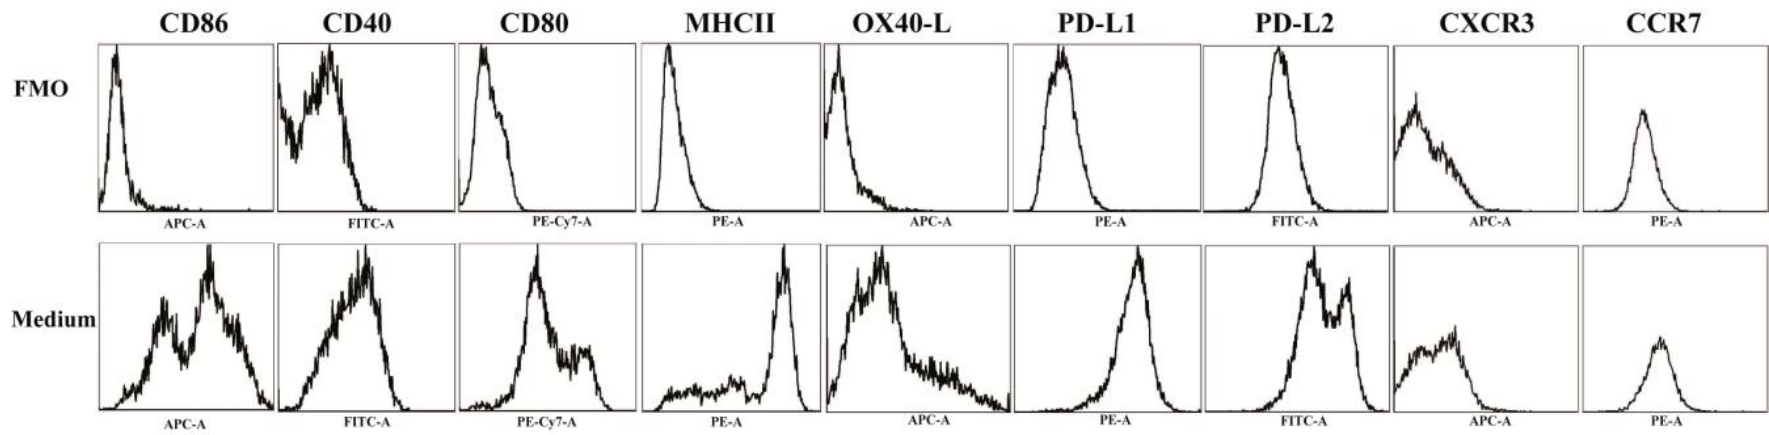

**Figure S8**

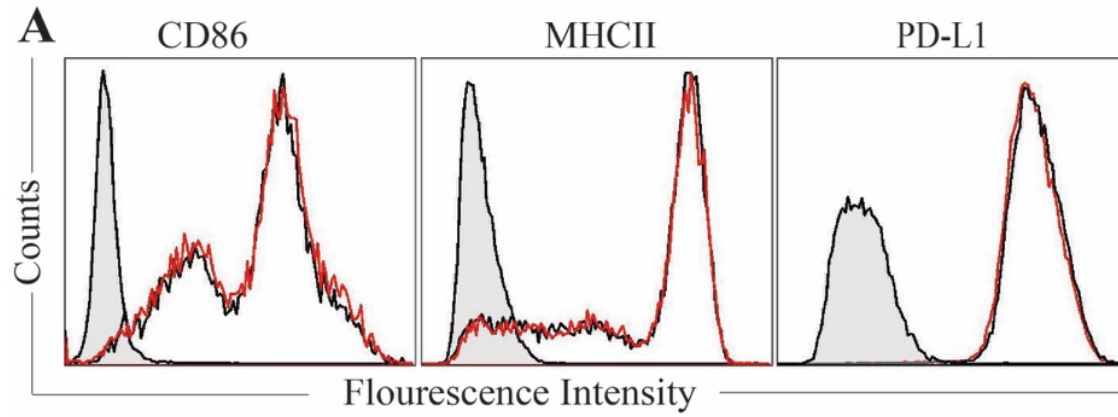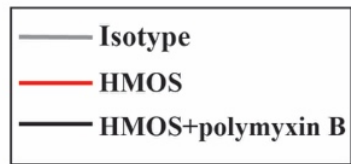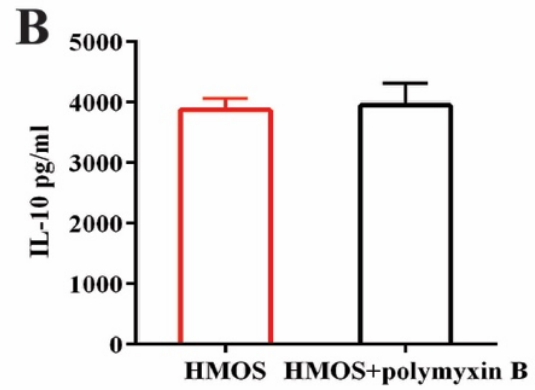



Figure S9

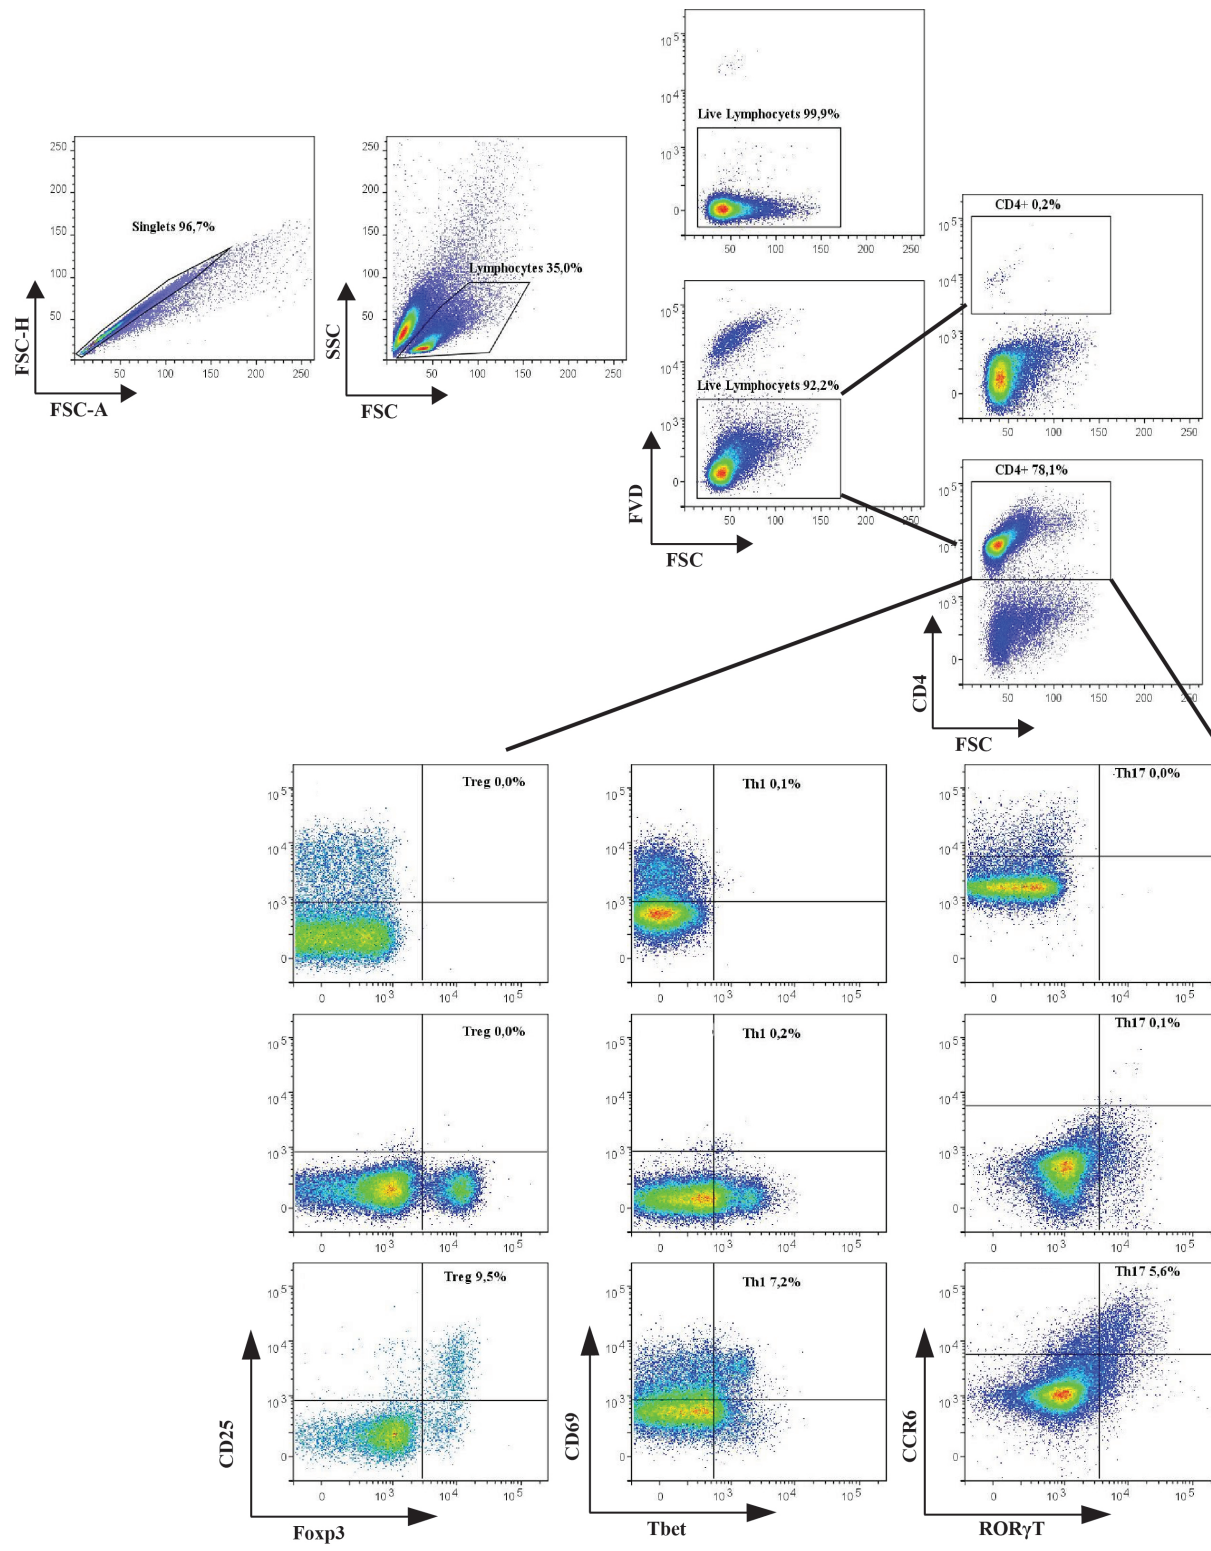

**Figure S10**

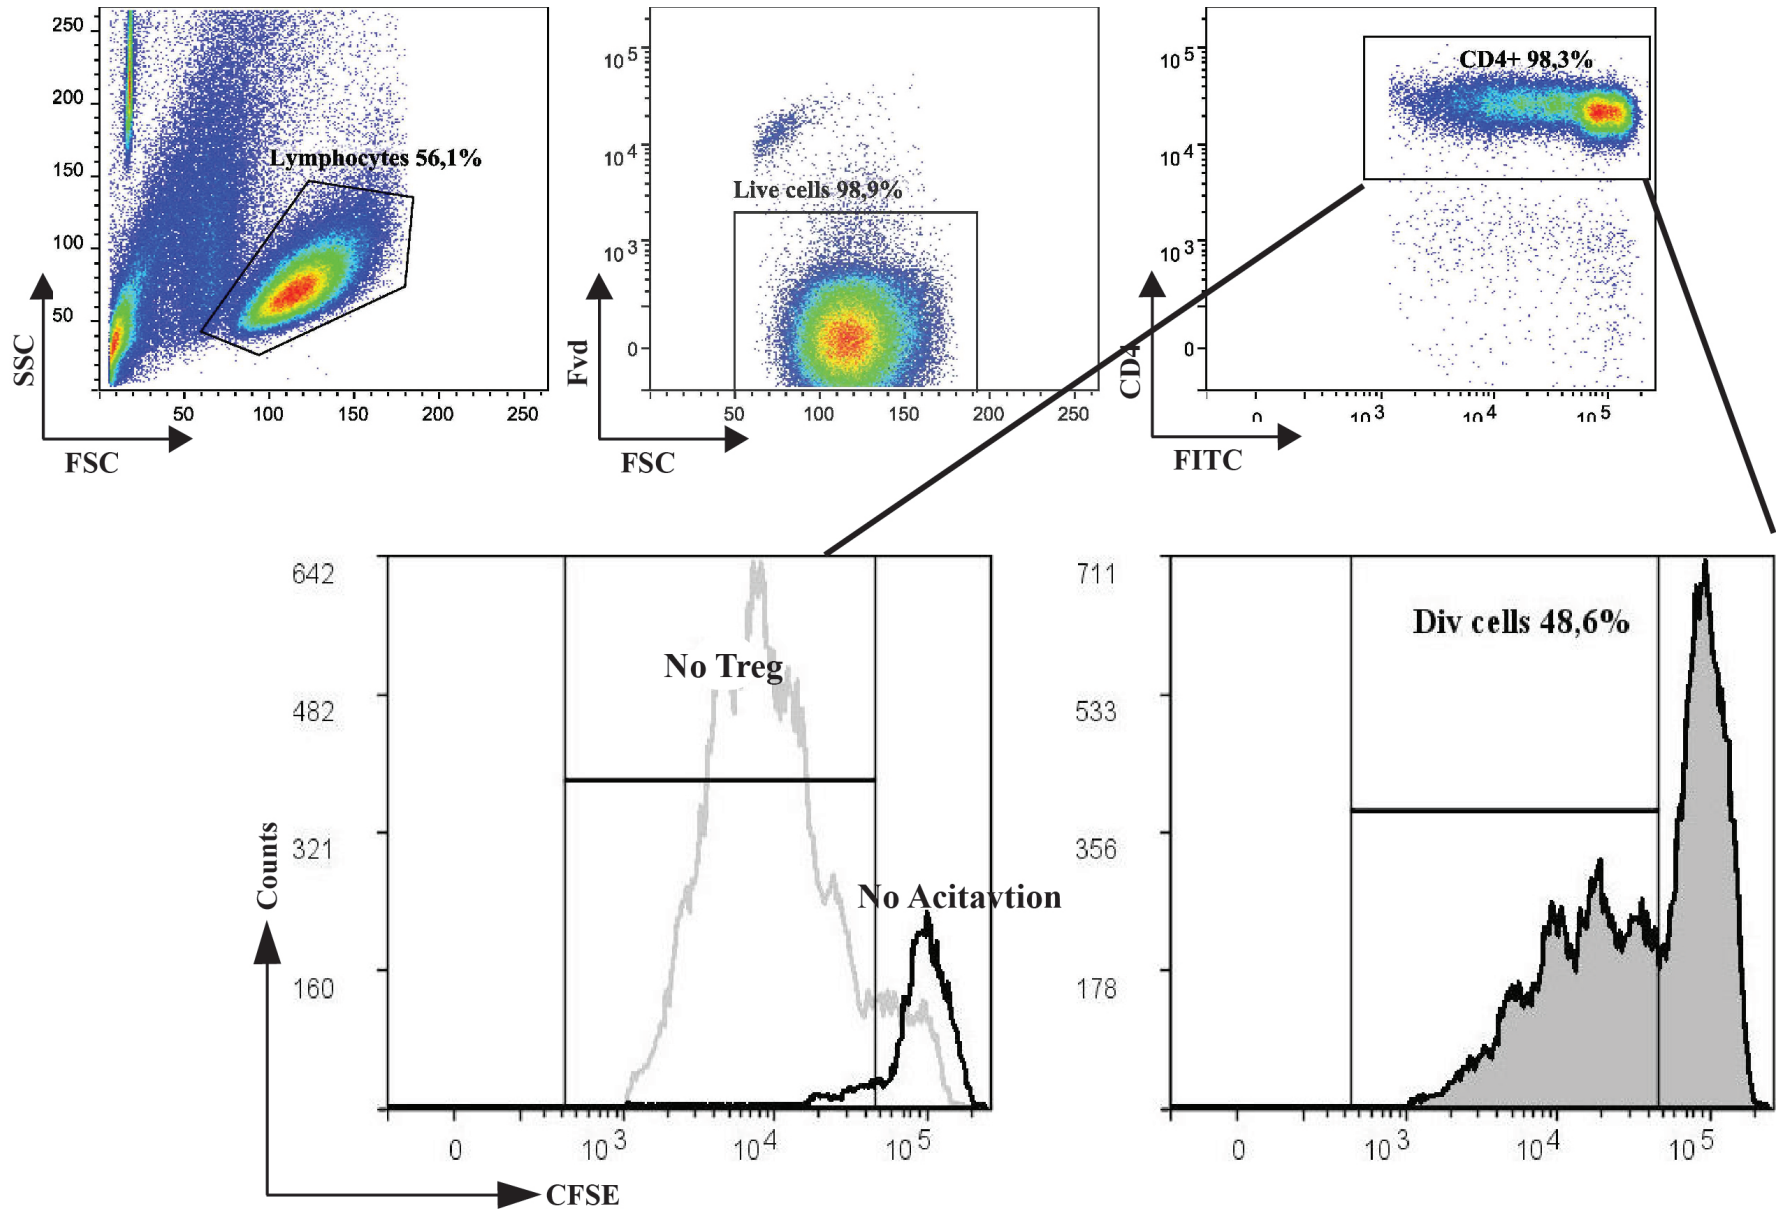

Supplement: 41598_2018_22052_MOESM1_ESM.pdf [file 41598_2018_22052_MOESM1_ESM.pdf]
